# Supplementary material
Source: PubMed Central journal article supplement (PMC6258046)
Supplement: NIHMS79303-supplement-1.pdf [file NIHMS79303-supplement-1.pdf]

Supplementary Figure S1.

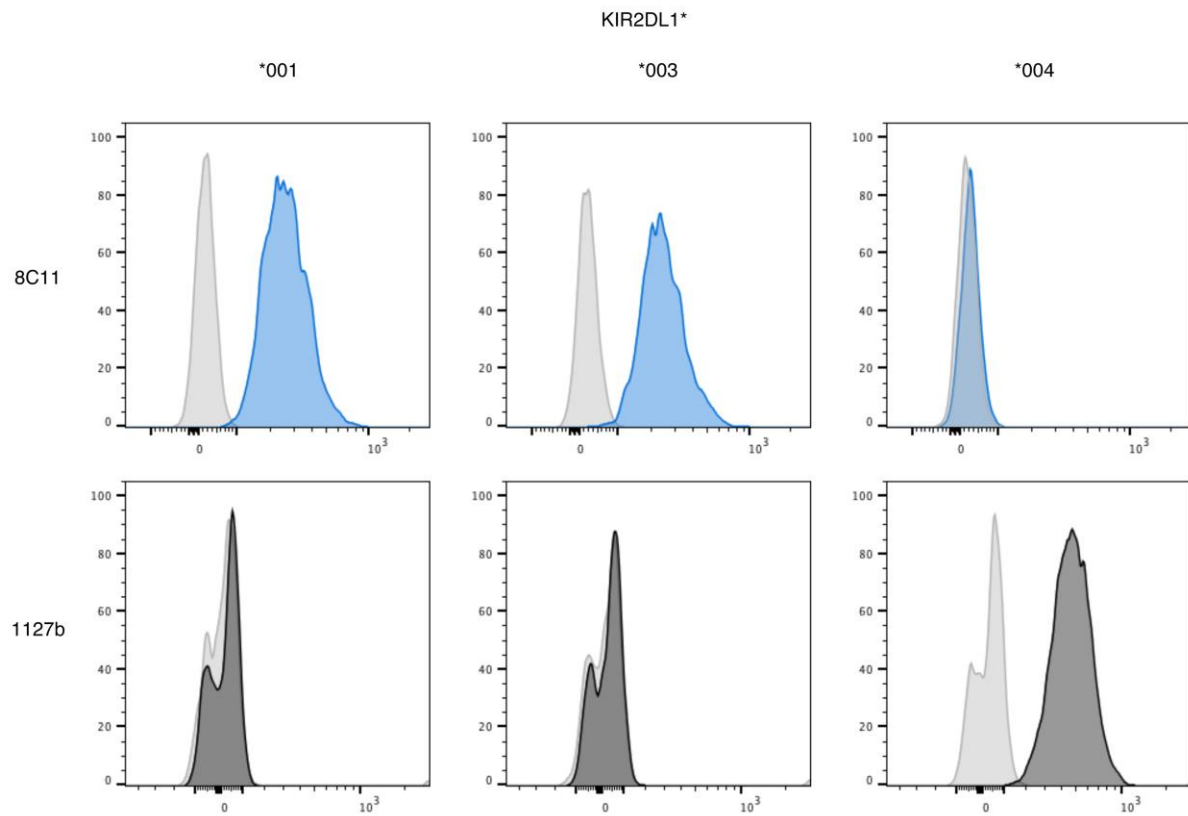

**Figure S1. Antibody binding profiles of YTS cells transfected with *KIR2DL1* allotypes**

YTS cells transfected with either *KIR2DL1*\*001, or \*003 or \*004 were stained with 8C11 and 1127b. The IgG control is shown in grey, 8C11 staining in blue and 1127b staining in black.

Supplementary Figure S2.

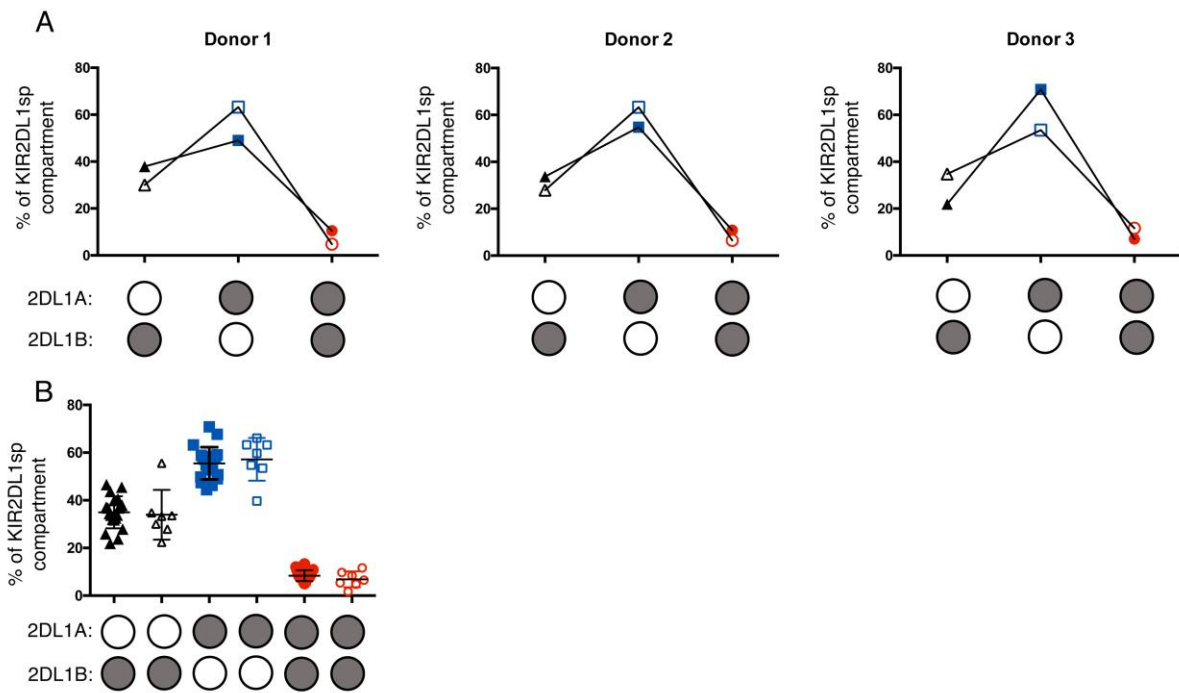

**Figure S2. KIR2DL1 allotype expression is similar between peripheral blood and decidua**

Matched cryopreserved decidual and peripheral blood mononuclear cells from donors heterozygous for *KIR2DL1A* and *KIR2DL1B* were stained.  $KIR2DL2/3/S2^{neg} 2DS1^{neg} 2DL1^{pos}$  NK cells were identified and proportions of  $KIR2DL1A^{pos}$  and  $KIR2DL1B^{pos}$  cells calculated. Data from 3 matched pairs (**A**) and all *KIR2DL1A/B* heterozygotes (**B**) are shown (mean  $\pm$  SD). Filled shapes = peripheral blood, open shapes = decidual NK cells.

**Supplementary Table S1.**

**Known Cross-reactivity of anti-KIR monoclonal antibodies, with selected KIR. Antibodies are indicated by their clone name**

| Clone  | 2DL1*001/002/003 | 2DL1*004 | 2DS1 | 2DL3 | 2DL2/S2 |
|--------|------------------|----------|------|------|---------|
| 8C11   | X                |          |      | X    | X       |
| 1127b  |                  | X        | X    |      |         |
| REA284 | X                | X        |      |      |         |
| EB6    | X                | X        | X    | *005 |         |
| GL183  |                  |          |      | X    | X       |
| CH-L   |                  |          |      | X    | X       |
| 143211 | X                | X        |      |      |         |

'X' indicates monoclonal does react with that KIR allotype.
